# Supplementary material for: Use of patient-reported outcome measures (PROMs) in clinical diabetes consultations: the DiaPROM randomised controlled pilot trial
Source: HighWire-hosted journal article supplement (doi:10.1136/bmjopen-2020-042353), 2021-04-01
Supplement: bmjopen-2020-042353supp001_data_supplement.pdf [file bmjopen-2020-042353supp001_data_supplement.pdf]

## DiaPROM pilot trial supplementary figure

**Supplementary figure 1:** Young adults' (18-39 years) perceptions about completing electronic PROMs at baseline - the DiaPROM pilot trial.

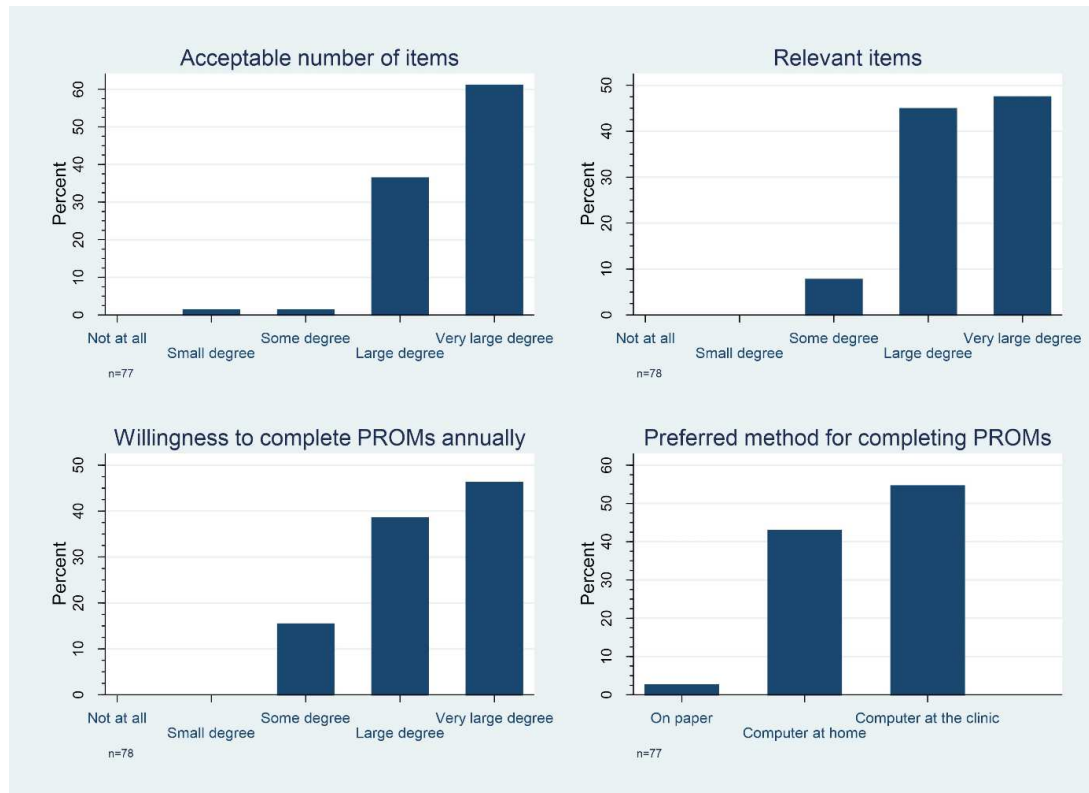

Hernar I, Graue M, Richards DA, Strandberg RB, Nilsen RM, Rekdal M, et al. Use of patient-reported outcome measures (PROMs) in clinical diabetes consultations: the DiaPROM randomised controlled pilot trial. *BMJ Open*. 2021;10.1136/bmjopen-2020-042353.
